# Supplementary material for: Replacement of Arabidopsis H2A.Z with human H2A.Z orthologs reveals extensive functional conservation and limited importance of the N-terminal tail sequence for Arabidopsis development
Source: PubMed Central journal article supplement — bioRxiv. 2024 Jul 12:2023.11.03.565555. Originally published 2023 Nov 5. Preprint. [Version 2] doi: 10.1101/2023.11.03.565555 (PMC10635141; doi:10.1101/2023.11.03.565555), 2024-07-12
Supplement: NIHPP2023.11.03.565555v1-supplement-1.pdf [file NIHPP2023.11.03.565555v1-supplement-1.pdf]

## SUPPLEMENTAL FIGURES

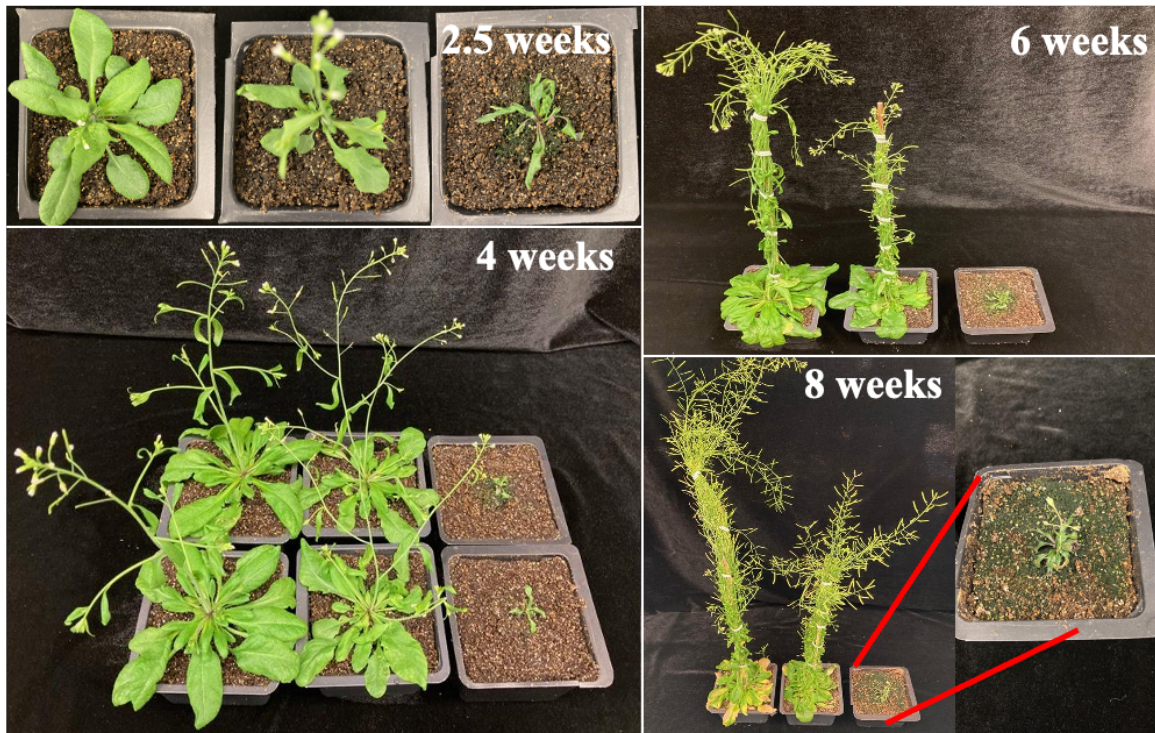

**Supplemental Figure 1. Complete loss-of-function *h2a.z* mutant plants have severe developmental defects.** WT (left), *h2a.z +/-* (middle), and *h2a.z* (right) plants, grown under long-day conditions, were individually photographed at four time points over eight weeks of growth. *h2a.z* mutant plants are dwarfed and have severely delayed development compared to *h2a.z +/-* and WT plants.

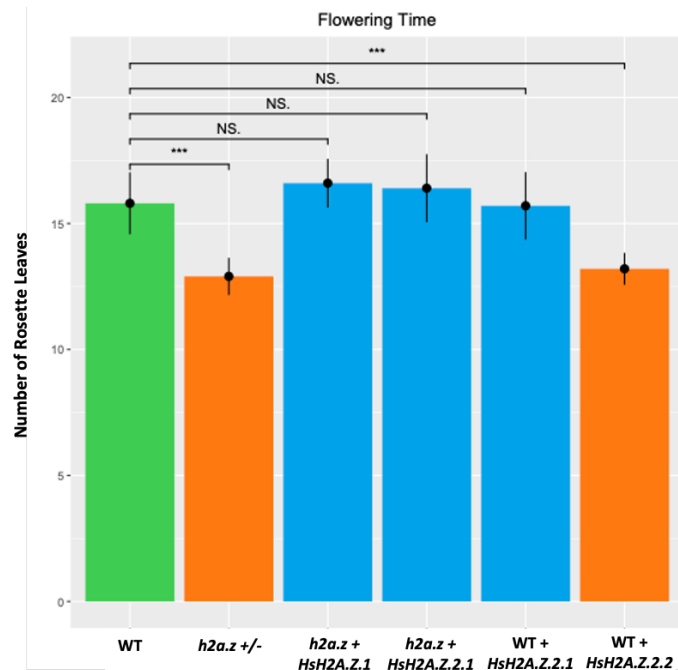

**Supplemental Figure 2. The average number of rosette leaves of WT plants, *h2a.z +/-*, *h2a.z + HsH2A.Z.1*, *h2a.z + HsH2A.Z.2.1*, WT + *HsH2A.Z.2.1*, and WT + *HsH2A.Z.2.2* transgenic plants at flowering.** Flowering time (assayed as an average number of rosette leaves from 10 different plants per genotype at the time of bolting) is significantly different between WT and *h2a.z +/-* (with p value=1.305e-05), as well as between WT and WT + *HsH2A.Z.2.2* plants (with p value=4.204e-05). T-test was used for statistical analysis.

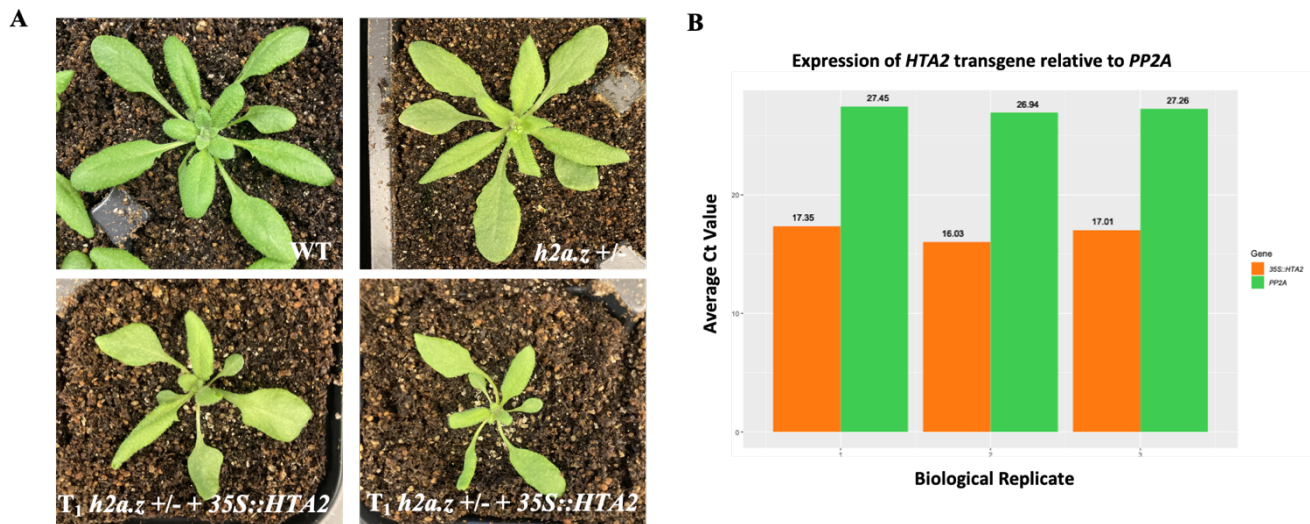

**Supplemental Figure 3. Overexpression of Arabidopsis canonical H2A histone HTA2 does not rescue *h2a.z +/-* phenotypic defects.** (A) Two weeks old plants were grown under long-day conditions and individually photographed. (B) The Ct values (expression) of the *HTA2* transgene

(orange bars) in three individual  $T_1$  plants (three biological replicates) relative to the Ct values of the endogenous control gene *PP2A* (green bars), as measured by qRT-PCR. Each biological replicate/transgenic plant had two technical qRT-PCR replicates.

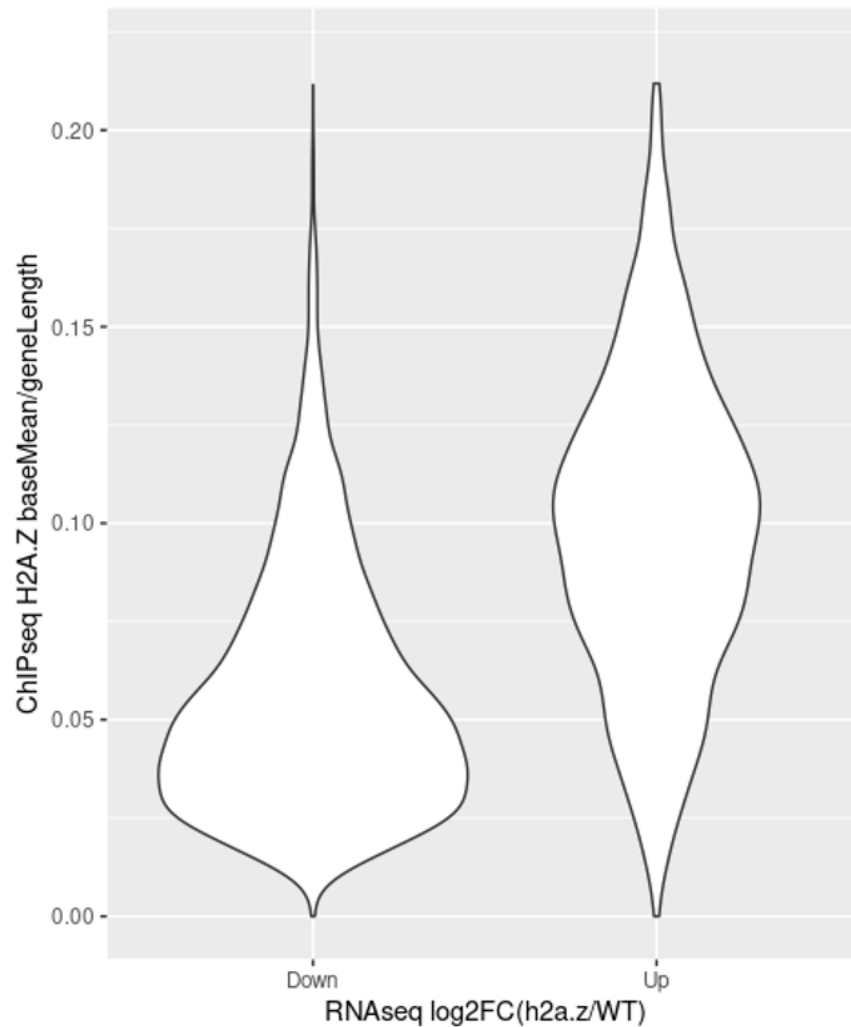

**Supplemental Figure 4. WT H2A.Z levels are higher at upregulated genes vs downregulated genes.** Violin plots showing average H2A.Z enrichment in WT across the bodies of genes either downregulated ( $n = 3714$ ) or upregulated ( $n = 4685$ ) in *h2a.z* plants. Counts are averaged over 3 DESeq2 normalized ChIP-seq replicates and corrected for gene length. Down and Up genes are defined as  $|L2FC| > 0.6$  and  $padj < 0.05$  with outliers excluded from each group.

**A**

|       |                                                                              |     |
|-------|------------------------------------------------------------------------------|-----|
| HTA11 | MAGKGGKGLVAAKTMAANKDKDKDKKPI SRSARAGIQFPVGR IHRQLKTRVSAHGRVGA                | 60  |
| HTA2  | MAGRGKQ-----LGSGAAKSTSRSSKAGLQFPVGR IARFLKAGK-YAERVGA                        | 47  |
|       | ***:* : . ** **:***:***** * **: *****                                        |     |
| HTA11 | TAAVYTASILEYLTAEVLELAGNAS <b>KDLKVKRITPRHLQLAIRGDEELDTL<b>IK</b></b> -GTIAGG | 119 |
| HTA2  | GAPVYLAADVLELAEVLELAGNA <b>ARDNKKTRIVPRHIQLAVRNDEELSKL<b>LG</b></b> DVVTIANG | 107 |
|       | * ** *.:****:*****:.* * .**.*:***:*.****.:.: ***.*                           |     |
| HTA11 | GVI <b>PHIHKSLINKTTKE</b> ----- 136                                          |     |
| HTA2  | GVMP <b>NIHNLLLPK</b> KAGSSKPTTEED 131                                       |     |
|       | **:*:**: * : *.: .                                                           |     |

**B**

|           |                                                                              |     |
|-----------|------------------------------------------------------------------------------|-----|
| H2A.Z.2.2 | -----MAGG--KAGKDSGKAKAKAVSRSQRAGLQFPVGR IHRHLKTRTTSHGRVGA                    | 49  |
| H2A.Z.1   | -----MAGG--KAGKDSGKAKTKAVSRSQRAGLQFPVGR IHRHLKSRTTSHGRVGA                    | 49  |
| H2A.Z.2.1 | -----MAGG--KAGKDSGKAKAKAVSRSQRAGLQFPVGR IHRHLKTRTTSHGRVGA                    | 49  |
| HTA9      | MSGKGAKGLIMGKPSG--SDKDKDKKPI TRSSRAGLQFPVGRVHRLKTRSTAHGRVGA                  | 58  |
| HTA8      | MAGKGGKGLLAAKTMAANKDSVKKKSI SRSARAGIQFPVGR IHRQLKTRVSAHGRVGA                 | 60  |
| HTA11     | MAGKGGKGLVAAKTMAANKDKDKDKKPI SRSARAGIQFPVGR IHRQLKTRVSAHGRVGA                | 60  |
|           | : . :... * * :.* ***:*****:* * * :.******                                    |     |
| H2A.Z.2.2 | TAAVYSAAILEYLTAEVLELAGNAS <b>KDLKVKRITPRHLQLAIRGDEELDSLKA</b> -TIAGGE        | 108 |
| H2A.Z.1   | TAAVYSAAILEYLTAEVLELAGNAS <b>KDLKVKRITPRHLQLAIRGDEELDSL<b>IK</b></b> ATIAGGG | 109 |
| H2A.Z.2.1 | TAAVYSAAILEYLTAEVLELAGNAS <b>KDLKVKRITPRHLQLAIRGDEELDSL<b>IK</b></b> ATIAGGG | 109 |
| HTA9      | TAAVYTAILEYLTAEVLELAGNAS <b>KDLKVKRISPRHLQLAIRGDEELDTL<b>IK</b></b> GTIAGGG  | 118 |
| HTA8      | TAAVYTASILEYLTAEVLELAGNAS <b>KDLKVKRITPRHLQLAIRGDEELDTL<b>IK</b></b> GTIAGGG | 120 |
| HTA11     | TAAVYTASILEYLTAEVLELAGNAS <b>KDLKVKRITPRHLQLAIRGDEELDTL<b>IK</b></b> GTIAGGG | 120 |
|           | *****.*:*****:*****:*****:*****:*****.* *****                                |     |
| H2A.Z.2.2 | KRRCS----- 113                                                               |     |
| H2A.Z.1   | V <b>IPHIHKS</b> LIGKKGQOKTV 128                                             |     |
| H2A.Z.2.1 | V <b>IPHIHKS</b> LIGKKGQOKTA 128                                             |     |
| HTA9      | V <b>IPHIHKS</b> LINKSAKE--- 134                                             |     |
| HTA8      | V <b>IPHIHKS</b> LVNKVTKD--- 136                                             |     |
| HTA11     | V <b>IPHIHKS</b> LINKTTKE--- 136                                             |     |

**Supplemental Figure 5. Conserved amino acids that contribute to H2A.Z unique function are found in both human and Arabidopsis H2A.Zs but not in Arabidopsis H2A histone. (A)** Clustal Omega alignment between Arabidopsis HTA11 (H2A.Z) and HTA2 (core H2A) histones. Amino acids that are important for H2A.Z identity are highlighted in bold within the AtHTA11 sequence and are not present in HTA2. **(B)** Clustal Omega alignment between human and Arabidopsis H2A.Zs. Amino acids that contribute to the H2A.Z unique function are highlighted in bold and are found in all Arabidopsis H2A.Zs and human H2A.Z.1 and H2A.Z.2.1, while in human H2A.Z.2.2. several key conserved residues at the C-terminal end are missing.

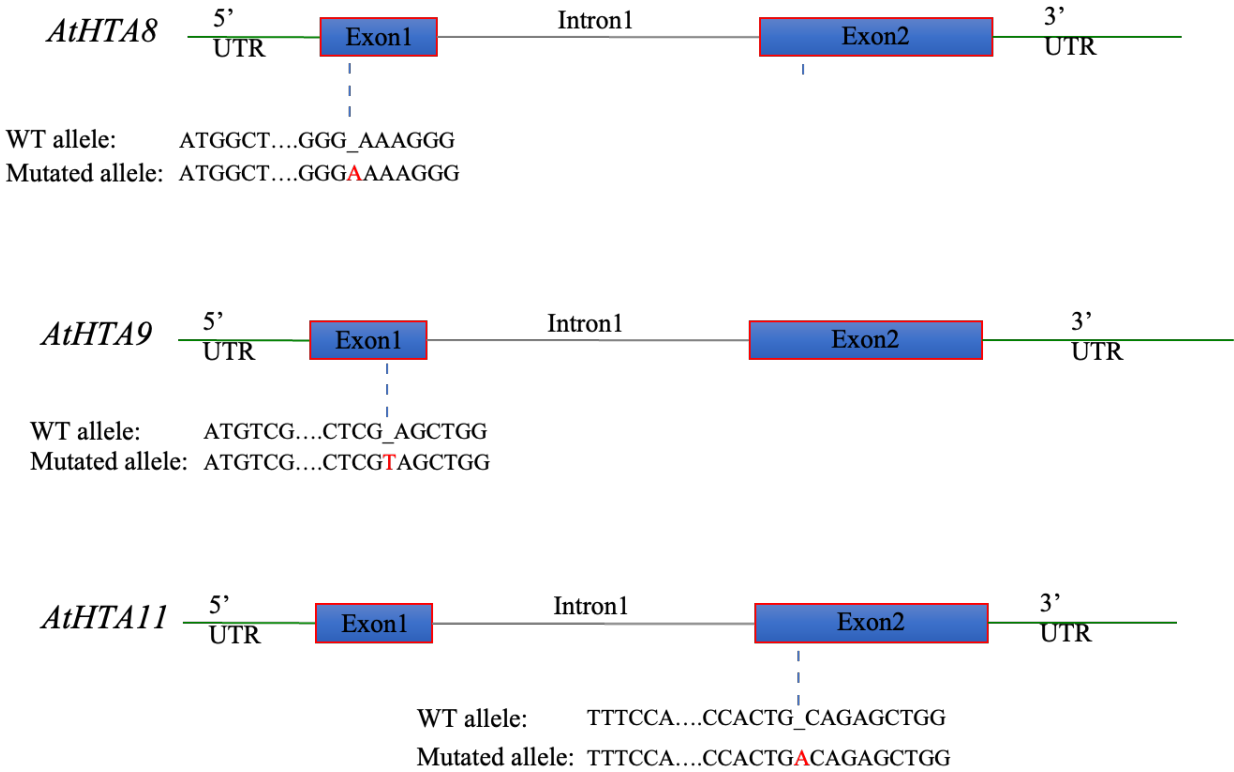

**Supplemental Figure 6. Graphical representation of Arabidopsis *h2a.z* CRISPR mutant alleles.** For each H2A.Z gene the location and the type of CRISPR mutation is shown. All three genes have an addition of a single base pair causing a frame shift that leads to a premature stop codon.
